# Supplementary material for: What exercise prescription is optimal to improve body composition and cardiorespiratory fitness in adults living with obesity? A network meta‐analysis
Source: PubMed Central journal article supplement (PMC7900983; doi:10.1111/obr.13137), 2020-09-08
Supplement: OBR-22-e13137-s001.pdf [file OBR-22-e13137-s001.pdf]

## **Supporting Documentation**

Supporting file **S1**: Search Strategy

Supporting file **S2**: Pairwise meta-analysis (example) for weight loss

Supporting file **S3**: Risks of Bias Assessment Results

Supporting file **S4**: Pre-post intervention data for MNA outcomes

Supporting file **S5**: Pre-post intervention data for outcomes not included in the NMA

Supporting file **S6**: Exercise categories that contribute to each NMA

Supporting file **S7**: Number of studies contributing to direct/indirect analysis for each MNA

Supporting file **S8**: Funnel plot graphics

**Supporting file S1: Search strategy**

| <b>Database</b>                                          | <b>Search Terms</b>                                                                                                                   |                       |                                                                                                                                                                                                                                          |
|----------------------------------------------------------|---------------------------------------------------------------------------------------------------------------------------------------|-----------------------|------------------------------------------------------------------------------------------------------------------------------------------------------------------------------------------------------------------------------------------|
|                                                          | <b>Randomised Controlled trial</b>                                                                                                    | <b>Obesity</b>        | <b>Exercise</b>                                                                                                                                                                                                                          |
| PUBMED                                                   | 'clinical trials as topic' [MeSH Major Topic] OR (randomized controlled trial) OR (controlled trial) OR (randomized controlled study) | obesity OR overweight | 'exercise therapy' [MeSH Major Topic] OR (physical activity) OR exercise OR aerobic OR resistance OR (strength training) OR (combined training) OR (concurrent training) OR (circuit training) OR (HIIT training) OR (interval training) |
| CENTRAL (Cochrane Central Register of Controlled Trials) | 'controlled clinical trial' [MeSH term] OR (randomized controlled trial)                                                              | obesity OR overweight | 'exercise' [MeSH term] OR (physical activity) OR aerobic OR resistance OR (strength training) OR (combined training) OR (concurrent training) OR (HIIT training)                                                                         |
| EMBASE                                                   | 'randomized controlled trial' [Emtree term] OR (controlled trial) OR (randomized controlled study) OR (clinical trial)                | obesity OR overweight | 'exercise' [Emtree term] OR (physical activity) OR aerobic OR resistance OR (strength training) OR (combined training) OR (concurrent training) OR (fitness training) OR (HIIT training) OR (interval training)                          |
| CINAHL and SPORTS DISCUS                                 | (randomized controlled trial) OR (controlled trial) OR (randomized controlled study) OR (clinical trial)                              | obesity OR overweight | exercise OR (physical activity) OR aerobic OR resistance OR (strength training) OR (combined training) OR (concurrent training) OR (fitness training) OR (HIIT training) OR (interval training)                                          |

**Supporting file S2: Example of pairwise meta-analysis for weight loss (Intervention duration included as co-variate)**

```
replace tx=1 if treat=="control"
replace tx=2 if treat=="Vigorous intensity aerobic"
replace tx=3 if treat=="Moderate intensity aerobic"
replace tx=4 if treat=="Resistance high"
replace tx=5 if treat=="Resistance low"
replace tx=6 if treat=="Combined high"
replace tx=7 if treat=="Combined low"
```

**Weight Loss**

Control versus aerobic high intensity

metan n2 m2 sd2 n1 m1 sd1

| Study          | SMD    | [95% Conf. Interval] |        | % Weight |
|----------------|--------|----------------------|--------|----------|
| 2              | 0.883  | 0.105                | 1.662  | 5.93     |
| 3              | -2.759 | -3.557               | -1.962 | 5.66     |
| 6              | -2.650 | -3.770               | -1.531 | 2.87     |
| 9              | -0.200 | -1.103               | 0.703  | 4.41     |
| 10             | -1.750 | -2.724               | -0.776 | 3.79     |
| 11             | -3.393 | -3.977               | -2.810 | 10.57    |
| 12             | -1.083 | -1.380               | -0.786 | 40.82    |
| 15             | -2.167 | -3.272               | -1.061 | 2.95     |
| 16             | -4.889 | -6.284               | -3.494 | 1.85     |
| 17             | -2.317 | -3.370               | -1.264 | 3.24     |
| 20             | -1.933 | -3.147               | -0.720 | 2.44     |
| 25             | -1.750 | -2.749               | -0.751 | 3.60     |
| 26             | -1.750 | -2.800               | -0.700 | 3.26     |
| 27             | -2.500 | -3.317               | -1.683 | 5.39     |
| 31             | 0.167  | -0.894               | 1.227  | 3.20     |
| I-V pooled SMD | -1.582 | -1.772               | -1.393 | 100.00   |

Heterogeneity chi-squared = 147.71 (d.f. = 14) p = 0.000  
I-squared (variation in SMD attributable to heterogeneity) = 90.5%

Test of SMD=0: z= 16.35 p = 0.000

Control versus treatment 2 (moderate intensity)

metan n3 m3 sd3 n1 m1 sd1

| Study          | SMD    | [95% Conf. Interval] |        | % Weight |
|----------------|--------|----------------------|--------|----------|
| 1              | -0.708 | -1.032               | -0.385 | 21.58    |
| 5              | 0.095  | -0.434               | 0.624  | 8.08     |
| 6              | -5.417 | -6.879               | -3.955 | 1.06     |
| 7              | 0.559  | 0.336                | 0.782  | 45.61    |
| 14             | -0.083 | -0.664               | 0.497  | 6.71     |
| 15             | -1.000 | -1.878               | -0.122 | 2.94     |
| 17             | -1.402 | -2.171               | -0.634 | 3.82     |
| 22             | -2.667 | -3.529               | -1.804 | 3.04     |
| 24             | -3.090 | -4.596               | -1.583 | 1.00     |
| 26             | -2.833 | -4.224               | -1.442 | 1.17     |
| 28             | -6.847 | -9.249               | -4.445 | 0.39     |
| 30             | 0.500  | -0.460               | 1.460  | 2.45     |
| 31             | 0.833  | -0.194               | 1.861  | 2.14     |
| I-V pooled SMD | -0.178 | -0.328               | -0.027 | 100.00   |

Control versus resistance high

| Study          | SMD    | [95% Conf. Interval] |        | % Weight |
|----------------|--------|----------------------|--------|----------|
| 5              | -0.617 | -1.154               | -0.080 | 44.94    |
| 14             | -0.083 | -0.659               | 0.492  | 39.15    |
| 22             | -2.917 | -3.819               | -2.014 | 15.91    |
| I-V pooled SMD | -0.774 | -1.134               | -0.414 | 100.00   |

Heterogeneity chi-squared = 27.53 (d.f. = 2) p = 0.000  
 I-squared (variation in SMD attributable to heterogeneity) = 92.7%

Test of SMD=0 : z= 4.22 p = 0.000

Control versus resistance low

| Study          | SMD    | [95% Conf. Interval] |        | % Weight |
|----------------|--------|----------------------|--------|----------|
| 5              | -0.617 | -1.154               | -0.080 | 44.94    |
| 14             | -0.083 | -0.659               | 0.492  | 39.15    |
| 22             | -2.917 | -3.819               | -2.014 | 15.91    |
| I-V pooled SMD | -0.774 | -1.134               | -0.414 | 100.00   |

Heterogeneity chi-squared = 27.53 (d.f. = 2) p = 0.000  
 I-squared (variation in SMD attributable to heterogeneity) = 92.7%

Test of SMD=0 : z= 4.22 p = 0.000

**Combined high versus control**

| Study          | SMD    | [95% Conf. Interval] |        | % Weight |
|----------------|--------|----------------------|--------|----------|
| 10             | -0.667 | -1.509               | 0.176  | 65.98    |
| 23             | -3.417 | -4.590               | -2.243 | 34.02    |
| I-V pooled SMD | -1.602 | -2.287               | -0.918 | 100.00   |

**Combined low versus control**

| Study          | SMD    | [95% Conf. Interval] |        | % Weight |
|----------------|--------|----------------------|--------|----------|
| 4              | 0.818  | -0.058               | 1.695  | 14.38    |
| 14             | -1.333 | -1.977               | -0.690 | 26.68    |
| 19             | -0.250 | -0.871               | 0.371  | 28.68    |
| 24             | -3.090 | -4.596               | -1.583 | 4.87     |
| 25             | -1.333 | -2.312               | -0.355 | 11.54    |
| 28             | -7.288 | -9.826               | -4.751 | 1.72     |
| 29             | -4.000 | -4.954               | -3.046 | 12.14    |
| I-V pooled SMD | -1.225 | -1.557               | -0.892 | 100.00   |

Heterogeneity chi-squared = 90.81 (d.f. = 6) p = 0.000  
 I-squared (variation in SMD attributable to heterogeneity) = 93.4%

Test of SMD=0 : z= 7.22 p = 0.000

Considerable heterogeneity observed (up to 93.1%) in one or more sub-groups,  
 Test for heterogeneity between sub-groups likely to be invalid

Significance test(s) of SMD=0

|         |          |           |
|---------|----------|-----------|
| 1       | z= 12.21 | p = 0.000 |
| 0       | z= 10.92 | p = 0.000 |
| Overall | z= 16.35 | p = 0.000 |

TREATMENT CONTROL VERSUS HIGH AEROBIC

metan n2 m2 sd2 n1 m1 sd1, by(dur\_dic) \*\*\*DURATION <= 12 weeks= 0 , control versus high aerobic)

| Study          | SMD    | [95% Conf. Interval] |        | % Weight |
|----------------|--------|----------------------|--------|----------|
| -----          |        |                      |        |          |
| 1> 12 weeks    |        |                      |        |          |
| 9              | -0.200 | -1.103               | 0.703  | 4.41     |
| 11             | -3.393 | -3.977               | -2.810 | 10.57    |
| 12             | -1.083 | -1.380               | -0.786 | 40.82    |
| 15             | -2.167 | -3.272               | -1.061 | 2.95     |
| 26             | -1.750 | -2.800               | -0.700 | 3.26     |
| Sub-total      |        |                      |        |          |
| I-V pooled SMD | -1.501 | -1.742               | -1.260 | 62.02    |
| -----          |        |                      |        |          |
| 0 <=12 weeks   |        |                      |        |          |
| 2              | 0.883  | 0.105                | 1.662  | 5.93     |
| 3              | -2.759 | -3.557               | -1.962 | 5.66     |
| 6              | -2.650 | -3.770               | -1.531 | 2.87     |
| 10             | -1.750 | -2.724               | -0.776 | 3.79     |
| 16             | -4.889 | -6.284               | -3.494 | 1.85     |
| 17             | -2.317 | -3.370               | -1.264 | 3.24     |
| 20             | -1.933 | -3.147               | -0.720 | 2.44     |
| 25             | -1.750 | -2.749               | -0.751 | 3.60     |
| 27             | -2.500 | -3.317               | -1.683 | 5.39     |
| 31             | 0.167  | -0.894               | 1.227  | 3.20     |
| Sub-total      |        |                      |        |          |
| I-V pooled SMD | -1.715 | -2.023               | -1.407 | 37.98    |
| -----          |        |                      |        |          |
| Overall        |        |                      |        |          |
| I-V pooled SMD | -1.582 | -1.772               | -1.393 | 100.00   |
| -----          |        |                      |        |          |

Test(s) of heterogeneity:

|                                                    | Heterogeneity statistic | degrees of freedom | P     | I-squared** |
|----------------------------------------------------|-------------------------|--------------------|-------|-------------|
| 1                                                  | 57.61                   | 4                  | 0.000 | 93.1%       |
| 0                                                  | 88.95                   | 9                  | 0.000 | 89.9%       |
| Overall                                            | 147.71                  | 14                 | 0.000 | 90.5%       |
| Overall Test for heterogeneity between sub-groups: |                         |                    |       |             |
|                                                    | 1.15                    | 1                  | 0.283 |             |

TREATMENT CONTROL VERSUS HIGH AEROBIC (26 weeks and less versus > 26 weeks)

| Study | SMD    | [95% Conf. Interval] |        | % Weight |
|-------|--------|----------------------|--------|----------|
| ----- |        |                      |        |          |
| 0     |        |                      |        |          |
| 2     | 0.883  | 0.105                | 1.662  | 5.93     |
| 3     | -2.759 | -3.557               | -1.962 | 5.66     |
| 6     | -2.650 | -3.770               | -1.531 | 2.87     |
| 10    | -1.750 | -2.724               | -0.776 | 3.79     |
| 15    | -2.167 | -3.272               | -1.061 | 2.95     |
| 16    | -4.889 | -6.284               | -3.494 | 1.85     |
| 17    | -2.317 | -3.370               | -1.264 | 3.24     |
| 20    | -1.933 | -3.147               | -0.720 | 2.44     |
| 25    | -1.750 | -2.749               | -0.751 | 3.60     |
| 26    | -1.750 | -2.800               | -0.700 | 3.26     |
| ----- |        |                      |        |          |

|                |  |        |        |        |        |
|----------------|--|--------|--------|--------|--------|
| 27             |  | -2.500 | -3.317 | -1.683 | 5.39   |
| 31             |  | 0.167  | -0.894 | 1.227  | 3.20   |
| Sub-total      |  |        |        |        |        |
| I-V pooled SMD |  | -1.748 | -2.033 | -1.462 | 44.19  |
| -----          |  |        |        |        |        |
| 1              |  |        |        |        |        |
| 9              |  | -0.200 | -1.103 | 0.703  | 4.41   |
| 11             |  | -3.393 | -3.977 | -2.810 | 10.57  |
| 12             |  | -1.083 | -1.380 | -0.786 | 40.82  |
| Sub-total      |  |        |        |        |        |
| I-V pooled SMD |  | -1.451 | -1.705 | -1.197 | 55.81  |
| -----          |  |        |        |        |        |
| Overall        |  |        |        |        |        |
| I-V pooled SMD |  | -1.582 | -1.772 | -1.393 | 100.00 |
| -----          |  |        |        |        |        |

Test(s) of heterogeneity:

|                                                    | Heterogeneity<br>statistic | degrees of<br>freedom | P     | I-squared** |
|----------------------------------------------------|----------------------------|-----------------------|-------|-------------|
| 0                                                  | 89.54                      | 11                    | 0.000 | 87.7%       |
| 1                                                  | 55.86                      | 2                     | 0.000 | 96.4%       |
| Overall                                            | 147.71                     | 14                    | 0.000 | 90.5%       |
| Overall Test for heterogeneity between sub-groups: |                            |                       |       |             |
|                                                    | 2.32                       | 1                     | 0.128 |             |

\*\* I-squared: the variation in SMD attributable to heterogeneity)

Considerable heterogeneity observed (up to 96.4%) in one or more sub-groups,  
Test for heterogeneity between sub-groups likely to be invalid

Significance test(s) of SMD=0

|         |          |           |
|---------|----------|-----------|
| 0       | z= 12.01 | p = 0.000 |
| 1       | z= 11.20 | p = 0.000 |
| Overall | z= 16.35 | p = 0.000 |

### Body Mass Index

. metan \_y \_stderr, sortby(\_y) by(\_contrast) random

| Study         | ES     | [95% Conf. Interval] | % Weight |
|---------------|--------|----------------------|----------|
| -----         |        |                      |          |
| 3 - 1         |        |                      |          |
| 1             | -6.966 | -7.809 -6.123        | 1.60     |
| 53            | -6.294 | -8.023 -4.565        | 1.22     |
| 6             | -5.380 | -6.708 -4.051        | 1.40     |
| 13            | -2.222 | -2.806 -1.638        | 1.69     |
| 38            | -2.172 | -3.315 -1.030        | 1.48     |
| 51            | -1.697 | -2.767 -0.627        | 1.51     |
| 30            | -1.296 | -2.040 -0.551        | 1.64     |
| 34            | -1.188 | -1.846 -0.529        | 1.66     |
| 19            | -0.802 | -1.394 -0.210        | 1.68     |
| 15            | -0.269 | -1.108 0.570         | 1.60     |
| 26            | -0.204 | -1.032 0.624         | 1.61     |
| 62            | 0.151  | -0.831 1.132         | 1.55     |
| 60            | 0.222  | -0.728 1.172         | 1.56     |
| Sub-total     |        |                      |          |
| D+L pooled ES | -2.109 | -3.235 -0.983        | 20.19    |
| -----         |        |                      |          |
| 2 - 1         |        |                      |          |
| 12            | -2.564 | -3.208 -1.919        | 1.67     |
| 5             | -2.092 | -3.006 -1.179        | 1.57     |
| 29            | -1.413 | -2.267 -0.560        | 1.60     |
| 3             | -1.412 | -2.051 -0.772        | 1.67     |
| 10            | -1.376 | -1.832 -0.921        | 1.72     |
| 11            | -1.087 | -1.385 -0.790        | 1.75     |
| 50            | -0.990 | -1.916 -0.064        | 1.57     |
| 33            | -0.467 | -1.465 0.530         | 1.54     |

|               |  |        |        |        |       |
|---------------|--|--------|--------|--------|-------|
| 25            |  | -0.409 | -1.279 | 0.462  | 1.59  |
| 28            |  | -0.365 | -1.054 | 0.324  | 1.65  |
| 44            |  | -0.275 | -1.117 | 0.566  | 1.60  |
| 61            |  | 0.000  | -1.059 | 1.059  | 1.52  |
| 9             |  | 0.143  | -0.759 | 1.045  | 1.58  |
| 2             |  | 0.506  | -0.249 | 1.260  | 1.63  |
| Sub-total     |  |        |        |        |       |
| D+L pooled ES |  | -0.878 | -1.298 | -0.458 | 22.66 |
| -----         |  |        |        |        |       |
| 7 - 1         |  |        |        |        |       |
| 55            |  | -6.497 | -8.268 | -4.726 | 1.20  |
| 40            |  | -2.339 | -3.506 | -1.173 | 1.47  |
| 59            |  | -1.961 | -2.631 | -1.291 | 1.66  |
| 21            |  | -1.336 | -1.948 | -0.725 | 1.68  |
| 46            |  | -0.055 | -0.932 | 0.822  | 1.59  |
| 4             |  | 0.888  | 0.001  | 1.775  | 1.58  |
| Sub-total     |  |        |        |        |       |
| D+L pooled ES |  | -1.734 | -3.088 | -0.380 | 9.18  |
| -----         |  |        |        |        |       |
| 3 - 2         |  |        |        |        |       |
| 7             |  | -3.288 | -4.268 | -2.308 | 1.55  |
| 52            |  | -0.707 | -1.640 | 0.226  | 1.57  |
| 31            |  | 0.118  | -0.576 | 0.811  | 1.65  |
| 63            |  | 0.151  | -0.909 | 1.210  | 1.51  |
| 27            |  | 0.204  | -0.556 | 0.965  | 1.63  |
| 14            |  | 0.342  | -0.052 | 0.735  | 1.73  |
| Sub-total     |  |        |        |        |       |
| D+L pooled ES |  | -0.492 | -1.429 | 0.445  | 9.65  |
| -----         |  |        |        |        |       |
| 5 - 1         |  |        |        |        |       |
| 54            |  | -4.264 | -5.601 | -2.927 | 1.39  |
| 32            |  | -1.109 | -1.899 | -0.319 | 1.62  |
| 39            |  | -0.501 | -1.491 | 0.488  | 1.54  |
| 45            |  | -0.000 | -0.856 | 0.856  | 1.60  |
| 8             |  | 0.598  | -0.201 | 1.397  | 1.62  |
| 18            |  | 1.049  | 0.547  | 1.550  | 1.71  |
| Sub-total     |  |        |        |        |       |
| D+L pooled ES |  | -0.622 | -1.833 | 0.589  | 9.48  |
| -----         |  |        |        |        |       |
| 4 - 1         |  |        |        |        |       |
| 35            |  | -0.871 | -1.512 | -0.230 | 1.67  |
| 16            |  | -0.576 | -1.425 | 0.273  | 1.60  |
| 20            |  | 0.000  | -0.575 | 0.575  | 1.69  |
| Sub-total     |  |        |        |        |       |
| D+L pooled ES |  | -0.457 | -1.016 | 0.102  | 4.96  |
| -----         |  |        |        |        |       |
| 4 - 3         |  |        |        |        |       |
| 17            |  | -0.307 | -1.147 | 0.532  | 1.60  |
| 36            |  | 0.317  | -0.306 | 0.939  | 1.68  |
| 22            |  | 0.802  | 0.241  | 1.363  | 1.69  |
| Sub-total     |  |        |        |        |       |
| D+L pooled ES |  | 0.334  | -0.257 | 0.926  | 4.97  |
| -----         |  |        |        |        |       |
| 7 - 3         |  |        |        |        |       |
| 23            |  | -0.535 | -1.094 | 0.025  | 1.69  |
| 57            |  | -0.203 | -1.081 | 0.675  | 1.59  |
| 42            |  | -0.167 | -1.148 | 0.814  | 1.55  |
| Sub-total     |  |        |        |        |       |
| D+L pooled ES |  | -0.388 | -0.813 | 0.038  | 4.83  |
| -----         |  |        |        |        |       |
| 7 - 4         |  |        |        |        |       |
| 24            |  | -1.336 | -1.919 | -0.754 | 1.69  |
| Sub-total     |  |        |        |        |       |
| D+L pooled ES |  | -1.336 | -1.919 | -0.754 | 1.69  |
| -----         |  |        |        |        |       |
| 6 - 1         |  |        |        |        |       |
| 37            |  | -2.793 | -3.864 | -1.722 | 1.51  |
| Sub-total     |  |        |        |        |       |

|               |  |        |        |        |        |
|---------------|--|--------|--------|--------|--------|
| D+L pooled ES |  | -2.793 | -3.864 | -1.722 | 1.51   |
| -----+-----   |  |        |        |        |        |
| 5 - 3         |  |        |        |        |        |
| 41            |  | 1.671  | 0.592  | 2.750  | 1.51   |
| 56            |  | 2.030  | 1.031  | 3.030  | 1.54   |
| Sub-total     |  |        |        |        |        |
| D+L pooled ES |  | 1.864  | 1.131  | 2.598  | 3.05   |
| -----+-----   |  |        |        |        |        |
| 7 - 5         |  |        |        |        |        |
| 58            |  | -2.233 | -3.257 | -1.210 | 1.53   |
| 43            |  | -1.838 | -2.937 | -0.739 | 1.50   |
| 49            |  | -0.055 | -0.912 | 0.801  | 1.60   |
| Sub-total     |  |        |        |        |        |
| D+L pooled ES |  | -1.347 | -2.751 | 0.056  | 4.62   |
| -----+-----   |  |        |        |        |        |
| 5 - 2         |  |        |        |        |        |
| 47            |  | 0.275  | -0.545 | 1.096  | 1.61   |
| Sub-total     |  |        |        |        |        |
| D+L pooled ES |  | 0.275  | -0.545 | 1.096  | 1.61   |
| -----+-----   |  |        |        |        |        |
| 7 - 2         |  |        |        |        |        |
| 48            |  | 0.220  | -0.620 | 1.061  | 1.60   |
| Sub-total     |  |        |        |        |        |
| D+L pooled ES |  | 0.220  | -0.620 | 1.061  | 1.60   |
| -----+-----   |  |        |        |        |        |
| Overall       |  |        |        |        |        |
| D+L pooled ES |  | -0.956 | -1.297 | -0.615 | 100.00 |
| -----+-----   |  |        |        |        |        |

Test(s) of heterogeneity:

|         | Heterogeneity<br>statistic | degrees of<br>freedom | P     | I-squared** | Tau-squared |
|---------|----------------------------|-----------------------|-------|-------------|-------------|
| 3 - 1   | 275.63                     | 12                    | 0.000 | 95.6%       | 4.0389      |
| 2 - 1   | 67.35                      | 13                    | 0.000 | 80.7%       | 0.4853      |
| 7 - 1   | 70.93                      | 5                     | 0.000 | 93.0%       | 2.5838      |
| 3 - 2   | 48.33                      | 5                     | 0.000 | 89.7%       | 1.1956      |
| 5 - 1   | 66.50                      | 5                     | 0.000 | 92.5%       | 2.0777      |
| 4 - 1   | 4.08                       | 2                     | 0.130 | 51.0%       | 0.1241      |
| 4 - 3   | 4.76                       | 2                     | 0.092 | 58.0%       | 0.1578      |
| 7 - 3   | 0.63                       | 2                     | 0.730 | 0.0%        | 0.0000      |
| 7 - 4   | 0.00                       | 0                     | .     | .%          | 0.0000      |
| 6 - 1   | 0.00                       | 0                     | .     | .%          | 0.0000      |
| 5 - 3   | 0.23                       | 1                     | 0.632 | 0.0%        | 0.0000      |
| 7 - 5   | 12.07                      | 2                     | 0.002 | 83.4%       | 1.2805      |
| 5 - 2   | 0.00                       | 0                     | .     | .%          | 0.0000      |
| 7 - 2   | 0.00                       | 0                     | .     | .%          | 0.0000      |
| Overall | 804.19                     | 62                    | 0.000 | 92.3%       | 1.7050      |

\*\* I-squared: the variation in ES attributable to heterogeneity)



**Supporting file S3: Risk of Bias Assessment**

| Author Year   | Method of Randomisation | Allocation Concealed | Blinding of Participant | Blinding of Research Personnel | Incomplete Outcome data | Dropout Rate % | Other Sources of Bias * | 1 | 2 | 3 | 4 | 5 | 6 | 7 | Overall Score (Category) |
|---------------|-------------------------|----------------------|-------------------------|--------------------------------|-------------------------|----------------|-------------------------|---|---|---|---|---|---|---|--------------------------|
| Alizadeh 2013 | Block                   | No                   | No                      | Nil stated                     | No                      | 31             | No                      | L | H | H | H | H | H | H | 5 (high)                 |
| Alves 2009    | Unclear                 | No                   | No                      | Nil stated                     | Yes                     | 6              | Yes                     | H | H | H | H | L | L | L | 3 (moderate)             |
| Arad 2015     | Unclear                 | No                   | No                      | Nil stated                     | No                      | 29             | No                      | H | H | H | H | H | H | H | 6 (high)                 |
| Arslan 2011   | Unclear                 | No                   | No                      | Nil stated                     | Unclear                 | not reported   | Yes                     | H | H | H | H | H | H | H | 6 (high)                 |
| Bonfante 2017 | Unclear                 | No                   | No                      | Nil stated                     | Unclear                 | not reported   | No                      | H | H | H | H | H | H | H | 6 (high)                 |
| Borg 2002     | Block                   | No                   | No                      | Nil stated                     | Unclear                 | 24             | Yes                     | L | H | H | H | H | H | L | 4 (moderate)             |
| Chih-Hui 2017 | Unclear                 | No                   | No                      | Nil stated                     | No                      | 9              | No                      | H | H | H | H | H | H | H | 6 (high)                 |
| Church 2007   | Block                   | Yes                  | No                      | Yes                            | Yes                     | 8              | Yes                     | L | L | L | H | L | L | L | 0 (low)                  |
| Croymans 2014 | Block                   | No                   | No                      | Yes                            | Unclear                 | <5             | No                      | L | H | L | H | H | H | H | 4 (moderate)             |
| Dengel 1996   | Unclear                 | No                   | No                      | Nil stated                     | No                      | not reported   | Yes                     | H | H | H | H | L | L | H | 4 (moderate)             |

|                      |            |     |    |            |         |              |     |   |   |   |   |   |   |   |                 |
|----------------------|------------|-----|----|------------|---------|--------------|-----|---|---|---|---|---|---|---|-----------------|
| Donges 2013          | Unclear    | No  | No | Nil stated | Yes     | 0            | No  | H | H | H | H | L | L | H | 4<br>(moderate) |
| Donnelly 2013        | Stratified | No  | No | Yes        | Yes     | 33           | Yes | L | H | H | H | H | L | L | 2<br>(low)      |
| Foster-Schubert 2012 | Stratified | No  | No | Yes        | No      | 9            | Yes | L | H | H | H | L | L | L | 1<br>(low)      |
| Frank 2005           | Unclear    | No  | No | Nil stated | Yes     | < 5          | Yes | H | H | L | H | L | L | L | 2<br>(low)      |
| Gram 2018            | Stratified | No  | No | Nil stated | No      | < 5          | Yes | L | H | H | H | H | H | L | 4<br>(moderate) |
| Herring 2014         | Non block  | No  | No | Nil stated | No      | 18           | Yes | L | H | H | H | H | H | H | 5<br>(high)     |
| Hintze 2018          | Unclear    | No  | No | Nil stated | No      | 23           | No  | H | H | H | H | H | H | H | 6<br>(high)     |
| Ho 2012 ±            | Sequence   | No  | No | Nil stated | Unclear | 30           | Yes | L | H | H | H | H | H | L | 4<br>(moderate) |
| Ho 2012 ±            | Sequence   | No  | No | Nil stated | Unclear | 30           | Yes | L | H | H | H | H | H | L | 4<br>(moderate) |
| Irving 2008          | Unclear    | No  | No | Nil stated | No      | 25           | Yes | H | H | H | H | H | H | L | 5<br>(high)     |
| Irwin 2003           | Stratified | Yes | No | Yes        | Yes     | <5           | Yes | L | L | L | H | L | L | L | 0<br>(low)      |
| Jabbour 2015         | Unclear    | No  | No | Nil stated | Unclear | Not reported | Yes | H | H | H | H | H | H | L | 5<br>(high)     |

|                     |            |     |    |            |         |              |     |   |   |   |   |   |   |   |          |
|---------------------|------------|-----|----|------------|---------|--------------|-----|---|---|---|---|---|---|---|----------|
| Jabbour 2017        | Unclear    | No  | No | Nil stated | Unclear | not reported | Yes | H | H | H | H | H | H | L | 5 (high) |
| Keating 2015        | Block      | Yes | No | Nil stated | Yes     | 10           | Yes | L | L | H | H | L | L | L | 1 (low)  |
| Keating 2017        | Block      | Yes | No | Nil stated | Yes     | <5           | Yes | L | L | H | H | L | L | L | 1 (low)  |
| Kline 2011          | Stratified | Yes | No | Yes        | Yes     | 12           | Yes | L | L | L | H | L | L | L | 0 (low)  |
| Mengistie 2013      | Nil stated | No  | No | Nil stated | Unclear | 12           | Yes | H | H | H | H | H | H | H | 6 (high) |
| Moghasdasi 2012     | Nil stated | No  | No | Nil stated | Unclear | not reported | No  | H | H | H | H | H | H | H | 6 (high) |
| Mohanka 2006        | Stratified | No  | No | Yes        | Yes     | <5           | Yes | L | H | H | H | L | L | L | 2 (low)  |
| Mora-Rodriguez 2017 | Nil stated | No  | No | Nil stated | No      | 15           | No  | H | H | H | H | H | H | H | 6 (high) |
| Nunes 2016          | Nil stated | No  | No | Nil stated | No      | 16           | No  | H | H | H | H | H | H | H | 6 (high) |
| Quist 2018          | Block      | Yes | No | Yes        | Yes     | 31           | Yes | L | L | L | H | L | L | L | 0 (low)  |
| Ross 2015           | Stratified | Yes | No | Yes        | Yes     | 28           | Yes | L | L | L | H | L | L | L | 0 (low)  |

|                            |            |     |    |            |         |              |     |   |   |   |   |   |   |   |                 |
|----------------------------|------------|-----|----|------------|---------|--------------|-----|---|---|---|---|---|---|---|-----------------|
| Rustaden 2017              | Block      | Yes | No | Nil stated | No      | 16           | Yes | L | L | H | H | H | H | L | 3<br>(moderate) |
| Sarsan 2006                | Nil stated | No  | No | Nil stated | No      | 21           | Yes | H | H | H | H | H | L | H | 4<br>(moderate) |
| Schroeder 2019             | Stratified | Yes | No | Yes        | No      | <5           | No  | L | L | L | H | L | L | L | 0<br>(low)      |
| Sheikholeslami-Vatani 2015 | Nil stated | No  | No | Nil stated | Unclear | not reported | No  | H | H | H | H | H | H | H | 6<br>(high)     |
| Soori 2017                 | Nil stated | No  | No | Nil stated | Unclear | Not reported | No  | H | H | H | H | H | H | H | 6<br>(high)     |
| Stensvold 2010             | Block      | No  | No | Yes        | Unclear | not reported | No  | L | H | L | H | H | H | H | 4<br>(moderate) |
| Tjonne 2008                | Stratified | No  | No | Yes        | No      | 13           | Yes | L | H | L | H | H | H | L | 3<br>(moderate) |
| Tong 2018                  | Stratified | No  | No | Nil stated | No      | 15           | Yes | L | H | H | H | H | H | H | 6<br>(high)     |
| Tseng 2013                 | Nil stated | No  | No | Nil stated | No      | 9            | Yes | H | H | H | H | H | H | H | 6<br>(high)     |
| Tumiati 2008               | Block      | No  | No | Yes        | No      | 31           | Yes | L | L | L | H | H | H | L | 2<br>(low)      |
| Van-Aggel Leijssen 2001    | Stratified | No  | No | Nil stated | Unclear | not reported | Yes | L | H | H | H | H | H | H | 5<br>(high)     |

|                               |            |    |    |            |         |                 |    |   |   |   |   |   |   |   |   |             |
|-------------------------------|------------|----|----|------------|---------|-----------------|----|---|---|---|---|---|---|---|---|-------------|
| Van-Aggel<br>Leijssen<br>2002 | Nil stated | No | No | Nil stated | Unclear | not<br>reported | No | H | H | H | H | H | H | H | H | 6<br>(high) |
|-------------------------------|------------|----|----|------------|---------|-----------------|----|---|---|---|---|---|---|---|---|-------------|

---

± same study











|                     |        |                 |                 |               |               |               |                |                |                |                |               |               |                |                |                |       |
|---------------------|--------|-----------------|-----------------|---------------|---------------|---------------|----------------|----------------|----------------|----------------|---------------|---------------|----------------|----------------|----------------|-------|
|                     |        | 101.1<br>(21.1) | 99.9<br>(9.1)   | -1.2<br>(0.5) | 33.2<br>(2.8) | 33.1<br>(3.7) | -0.1<br>(1.5)  |                |                |                |               |               | 2.28<br>(0.3)  | 2.32<br>(0.3)  |                |       |
| Keating 2015        | CON    | 90.7<br>(4.9)   | 91.5<br>(5.0)   | 0.8<br>(0.45) | 32.2<br>(1.4) | 32.9<br>(1.4) | 0.7<br>(2.32)  | 93.7<br>(1.5)  | 94.5<br>(1.6)  | 0.8<br>(0.63)  |               |               | 1.97<br>(0.16) | 1.95<br>(0.15) | -1.15          |       |
|                     | AE-V   | 103.1<br>(5.6)  | 101.8<br>(5.7)  | -1.3<br>(1.2) | 36.3<br>(1.7) | 35.8<br>(1.7) | -0.5<br>(0.73) | 106.6<br>(4.7) | 104.1<br>(4.5) | -2.5<br>(1.88) |               |               | 2.26<br>(0.11) | 2.53<br>(0.15) | 11.95          |       |
|                     | AE-M   | 88.1<br>(3.8)   | 88.9<br>(3.9)   | 0.1<br>(1.2)  | 31.3<br>(0.8) | 31.5<br>(1.0) | 0.2<br>(0.31)  | 95.1<br>(2.9)  | 94.1<br>(2.9)  | -1.0<br>(1.18) |               |               | 2.39<br>(0.11) | 2.59<br>(0.09) | 8.37           |       |
|                     |        | 96.1<br>(5.5)   | 94.7<br>(18.9)  | -1.4<br>(1.2) | 33.9<br>(0.9) | 33.4<br>(0.9) | -0.5<br>(0.32) | 104.5<br>(2.9) | 102<br>(3.0)   | -2.5<br>(1.2)  |               |               | 1.99<br>(0.10) | 2.19<br>(0.13) | 10.52          |       |
|                     | AE-M   |                 |                 |               |               |               |                |                |                |                |               |               |                |                |                |       |
| Keating 2017        | CON    | 85.5<br>(3.6)   | 85.7<br>(3.8)   | 3.8<br>(0.2)  | 30.8<br>(1.0) | 31.3<br>(1.3) | 0.5<br>(0.38)  | 92.3<br>(2.2)  | 92.9<br>(2.4)  | 0.6<br>(0.87)  |               |               | 1.84<br>(0.15) | 1.85<br>(0.15) | 0.55           |       |
|                     | R-HI   | 86.5<br>(4.9)   | 86.6<br>(4.3)   | 4.3<br>(0.1)  | 32.2<br>(1.2) | 32.2<br>(1.2) | 0.01<br>(0.40) | 97.6<br>(3.3)  | 96.3<br>(3.2)  | -1.3<br>(1.19) |               |               | 2.04<br>(0.11) | 2.11<br>(0.12) | 3.44           |       |
| Kline 2011          | CON    | 99.3<br>(5.1)   | 98.7<br>(5.0)   | -0.6<br>(1.2) |               |               |                | 104.4<br>(3.8) | 105.8<br>(3.9) | 1.4<br>(1.36)  | 40.6<br>(1.9) | 40.8<br>(1.9) | 0.2<br>(0.67)  |                |                |       |
|                     | COM-LM | 105.6<br>(3.0)  | 104.7<br>(3.3)  | -0.9<br>(1.2) |               |               |                | 110.8<br>(2.3) | 110.2<br>(2.3) | -0.6<br>(0.63) | 42.1<br>(1.9) | 41.1<br>(1.9) | 1.1<br>(0.45)  |                |                |       |
| Mengistie 2013      | CON    | 86.1<br>(1.8)   |                 | 1.0<br>(0.5)  | 30.3<br>(0.6) |               | 0.4<br>(0.4)   | 110.5<br>(2.5) |                | 1.6<br>(0.8)   | 37.5<br>(2.2) |               | 1.1<br>(0.6)   |                |                |       |
|                     | COM-LM | 86.3<br>(3.1)   |                 | -5.3<br>(1.2) | 30.4<br>(0.7) |               | -1.9<br>(0.5)  | 111.0<br>(2.7) |                | -4.2<br>(1.2)  | 37.2<br>(3.3) |               | -4.3<br>(1.1)  |                |                |       |
| Moghasdasi 2012     | CON    | 90.46<br>(13.9) | 90.66<br>(14.1) | 0.2<br>(1.5)  | 32.1<br>(5.3) | 32.1<br>(5.3) | 0.01<br>(5.4)  |                |                |                | 31.4<br>(5.5) | 31.4<br>(5.5) | 0<br>(2.75)    | 2.89<br>(0.7)  | 2.89<br>(0.7)  | 0     |
|                     | AE-V   | 87.8<br>(8.5)   | 85.1<br>(8.8)   | 14.1<br>(0.2) | 30.9<br>(2.1) | 29.9<br>(2.2) | -1.0<br>(1.35) |                |                |                | 29.6<br>(3.1) | 27.3<br>(3.7) | -2.3<br>(1.7)  | 2.82<br>(0.35) | 3.17<br>(0.40) | 12.42 |
| Mohanka 2006        | CON    | 81.7<br>(12)    |                 |               |               |               |                |                |                |                |               |               | 2.64<br>(0.26) | 2.63<br>(0.25) | -0.38          |       |
|                     | AE-M   | 81.6<br>(14)    |                 |               |               |               |                |                |                |                |               |               | 2.64<br>(0.14) | 2.97<br>(0.15) | 12.5           |       |
| Mora-Rodriguez 2017 | CON    |                 |                 |               |               |               |                | 107<br>(5.8)   | 107<br>(5.6)   | 0<br>(1.8)     |               |               | 1.49<br>(0.43) | 1.5<br>(0.46)  | 0.67           |       |
|                     | AE-V   | 92.6            | 90.7            | -1.9          | 32.9          | 31.9          |                | 107            | 105            | -2.0           |               |               | 1.4            | 1.5            | 7.14           |       |

|               |      |        |        |       |       |       |       |        |        |        |       |       |        |       |       |
|---------------|------|--------|--------|-------|-------|-------|-------|--------|--------|--------|-------|-------|--------|-------|-------|
|               |      | (13.1) | (11.2) | (2.2) | (8.1) | (8)   |       | (7.3)  | (6.3)  | (2.15) |       | (0.5) | (0.41) |       |       |
| Nunes 2016    | CON  |        |        |       | 32.4  |       |       | 91.5   | 95.5   | 4.0    | 38.2  | 37.3  | -0.9   |       |       |
|               |      |        |        |       | (8.1) |       |       | (13.2) | (12.8) | (5.09) | (4.1) | (5.4) | (1.88) |       |       |
|               | R-ML |        |        |       | 29.4  |       |       | 88.0   | 84.0   | -4.0   | 36.9  | 32.7  | -4.2   |       |       |
|               |      |        |        |       | (9.8) |       |       | (13.4) | (13.7) | (5.5)  | (6.8) | (5.3) | (2.5)  |       |       |
|               | R-ML |        |        |       | 29.4  |       |       | 90.0   | 88.0   | -2.0   | 36.8  | 33.7  | -3.1   |       |       |
|               |      |        |        |       | (4.1) |       |       | (5.2)  | (11)   | (3.37) | (3.9) | (3.3) | (1.42) |       |       |
| Quist 2018    | CON  | 93.2   |        | 0.3   | 30.1  |       |       |        |        |        |       |       | 2.55   | 2.52  | -1.18 |
|               |      | (11.8) |        |       | (2.6) |       |       |        |        |        |       |       | (0.8)  | (0.7) |       |
|               | AE-M | 90.7   |        | -0.3  | 30.4  |       |       |        |        |        |       |       | 2.68   | 2.98  | 11.19 |
|               |      | (12.7) |        |       | (3.1) |       |       |        |        |        |       |       | (0.5)  | (0.6) |       |
|               | AE-M | 89.5   |        | -0.3  | 29.2  |       |       |        |        |        |       |       | 2.68   | 2.91  | 8.58  |
|               |      | (11.1) |        |       | (1.9) |       |       |        |        |        |       |       | (0.5)  | (0.6) |       |
|               | AE-V | 92.4   |        | -0.8  | 30.1  |       |       |        |        |        |       |       | 2.68   | 3.10  | 15.67 |
|               |      | (14.1) |        |       | (2.4) |       |       |        |        |        |       |       | (0.6)  | (0.7) |       |
| Ross 2015     | CON  | 94.2   |        |       | 33.1  |       |       | 109.5  |        |        |       |       | 2.7    |       |       |
|               |      | (17.1) |        |       | (4.6) |       |       | (10.5) |        |        |       |       | (0.8)  |       |       |
|               | AE-M | 95.8   |        |       | 33.5  |       |       | 111.1  |        |        |       |       | 2.6    |       |       |
|               |      | (17.9) |        |       | (4.9) |       |       | (11.2) |        |        |       |       | (0.7)  |       |       |
|               | AE-M | 94.0   |        |       | 33.7  |       |       | 110.7  |        |        |       |       | 2.7    |       |       |
|               |      | (15.2) |        |       | (4.4) |       |       | (11.3) |        |        |       |       | (0.7)  |       |       |
|               | AE-V | 97.0   |        |       | 33.4  |       |       | 111.3  |        |        |       |       | 2.7    |       |       |
|               |      | (16.4) |        |       | (4.3) |       |       | 12.1   |        |        |       |       | (0.7)  |       |       |
| Rustaden 2017 | CON  | 86.4   |        | 0.1   | 30.8  |       | -0.4  |        |        |        | 30.8  |       | -0.8   |       |       |
|               |      | (14.5) |        | (0.8) | (5.1) |       | (0.7) |        |        |        | (6.1) |       | (1.5)  |       |       |
|               | R-HI | 86.2   |        | 0.3   | 30.8  |       | -0.3  |        |        |        | 38.7  |       | -0.8   |       |       |
|               |      | (14.1) |        | (0.8) | (4.9) |       | (0.8) |        |        |        | (6.3) |       | (1.5)  |       |       |
|               | R-HI | 93.3   |        | 0.9   | 32.2  |       | -0.2  |        |        |        | 41.1  |       | -1.5   |       |       |
|               |      | (21.1) |        | (0.2) | (6.1) |       | (0.8) |        |        |        | (6.2) |       | (1.7)  |       |       |
|               | R-HI | 84.4   |        | 0.1   | 30.2  |       | -0.3  |        |        |        | 38.4  |       | -1.1   |       |       |
|               |      | (14.3) |        | (0.8) | (5.4) |       | (0.6) |        |        |        | (6.5) |       | (2.2)  |       |       |
| Sarsan 2006   | CON  | 86.6   | 86.4   | -0.2  | 35.4  | 35.4  | 0.01  | 99.7   | 99.7   | 0.01   |       |       | 2.18   | 2.17  | -0.45 |
|               |      | (11.3) | (11.5) | (1.2) | (3.7) | (3.7) | (1.5) | (8.2)  | (8.7)  | (2.7)  |       |       | (0.4)  | (0.3) |       |
|               | AE-M | 87.5   | 84.1   | -3.4  | 35.4  | 33.9  | -1.5  | 99.0   | 93.2   | -5.8   |       |       | 2.38   | 2.76  | 15.2  |
|               |      | (11.7) | (12)   | (1.2) | (4.9) | (5.0) | (2.4) | (8.7)  | (8.7)  | (2.7)  |       |       | (0.5)  | (0.4) |       |

|                                |        |                 |                 |               |               |               |                |                 |                 |                |               |               |                |               |       |
|--------------------------------|--------|-----------------|-----------------|---------------|---------------|---------------|----------------|-----------------|-----------------|----------------|---------------|---------------|----------------|---------------|-------|
|                                | R-ML   | 83.8<br>(9.5)   | 80.1<br>(9.5)   | -3.7<br>(1.2) | 33.7<br>(2.9) | 32.6<br>(2.9) | -1.1<br>(1.1)  | 93.5<br>(6.4)   | 93.5<br>(6.4)   | -2.3<br>(2.0)  |               | 2.27<br>(0.4) | 2.49<br>(0.4)  | 8.5           |       |
| Schroeder 2019                 | CON    | 91.4<br>(16)    |                 | 0.1           | 32.4<br>(3.7) |               | 0.0            | 106.0<br>(10.0) |                 | 0.5            | 41.4<br>(5.7) | 0.2           | 2.73<br>(0.7)  |               | 6.22  |
|                                | AE-V   | 97.1<br>(20.7)  |                 | -1.0          | 32.4<br>(5.2) |               | -0.3           | 103.0<br>(14.0) |                 | 0.4            | 39.1<br>(8.6) | -0.5          | 2.89<br>(0.9)  |               | 25.25 |
|                                | R-HI   | 93.6<br>(18.9)  |                 | -0.2          | 32.5<br>(5.9) |               | -0.1           | 106<br>(17.0)   |                 | -1.7           | 39.4<br>(8)   | -0.2          | 2.91<br>(0.8)  |               | 5.15  |
|                                | COM-HI | 95.8<br>(21.2)  |                 | 0.9           | 31.9<br>(5.5) |               | 0.2            | 104<br>(13.0)   |                 | 0.9            | 40.6<br>(10)  | -0.5          | 3.26<br>(1.1)  |               | 13.19 |
| Sheikholeslami-<br>Vatani 2015 | CON    | 98.5<br>(5.9)   | 98.8<br>(6.1)   | 0.3<br>(1.2)  | 32.1<br>(1.2) | 32.2<br>(1.3) | 0.1<br>(0.55)  |                 |                 |                | 30.9<br>(3.5) | 31.2<br>(3.7) | 0.3<br>(1.6)   |               |       |
|                                | COM-HI | 97.5<br>(5.3)   | 93.5<br>(4.9)   | -4<br>(1.2)   | 31.4<br>(1.1) | 30.1<br>(0.7) | -1.3<br>(0.39) |                 |                 |                | 28.5<br>(3.2) | 23.6<br>(2.8) | -4.9<br>(1.3)  |               |       |
|                                | COM-HI | 96.6<br>(4.8)   | 93.1<br>(3.8)   | -3.5<br>(1.2) | 31.9<br>(0.9) | 30.8<br>(0.7) | -1.1<br>(0.33) |                 |                 |                | 30.7<br>(4.3) | 26.3<br>(3.7) | -4.4<br>(1.8)  |               |       |
| Soori 2017                     | CON    | 76.5<br>(2.4)   | 76.8<br>(2.5)   | 0.3<br>(0.5)  | 30.7<br>(1.0) | 30.9<br>(1.1) | 0.2<br>(0.5)   |                 |                 |                | 40.1<br>(1.2) | 40.1<br>(1.1) | 0.01<br>(0.58) |               |       |
|                                | AE-M   | 77.3<br>(1.3)   | 74.8<br>(1.9)   | -2.5<br>(1.2) | 31.0<br>(1.7) | 29.9<br>(1.3) | -1.1<br>(0.81) |                 |                 |                | 40.2<br>(2.4) | 39.9<br>(2.4) | -0.3<br>(1.2)  |               |       |
|                                | R-ML   | 76.0<br>(2.8)   | 75.8<br>(2.8)   | -0.2<br>(0.5) | 30.1<br>(1.4) | 30<br>(0.5)   | -0.1<br>(0.47) |                 |                 |                | 40.1<br>(1.5) | 40.1<br>(1.5) | 0.00<br>(0.75) |               |       |
|                                | COM-ML | 75.8<br>(2.7)   | 73.3<br>(2.6)   | -2.5<br>(1.1) | 30.7<br>(1.1) | 29.5<br>(0.8) | -1.2<br>(0.53) |                 |                 |                | 39.2<br>(1.8) | 38.7<br>(2.0) | -0.5<br>(0.95) |               |       |
| Stensvold 2010                 | CON    | 100.9<br>(9.4)  | 101.6<br>(10.2) | 0.7           | 31.9<br>(4.1) | 32<br>(4.2)   | 0.1            | 108.7<br>(9.3)  | 110.4<br>(9.0)  | 1.7            |               |               | 3.4<br>(1.02)  | 3.3<br>(0.9)  | -2.94 |
|                                | AE-V   | 99.7<br>(18.7)  | 98.3<br>(18.3)  | -1.4          | 31.3<br>(4.3) | 30.9<br>(4.6) | -0.4           | 109.6<br>(10.0) | 108.3<br>(10.7) | -1.3           |               |               | 3.4<br>(0.91)  | 3.8<br>(0.9)  | 11.76 |
|                                | R-HI   | 91.7<br>(14.7)  | 92.4<br>(14.8)  | 0.7           | 30.3<br>(3.5) | 30.4<br>(3.6) | 0.1            | 106.2<br>(8.6)  | 105.5<br>(8.2)  | -0.7           |               |               | 2.7<br>(1.1)   | 2.9<br>(0.9)  | 7.41  |
|                                | COM-HI | 103.4<br>(17.1) | 102.5<br>(17.2) | -0.9          | 32.2<br>(4.2) | 32.2<br>(4.4) | 0.01           | 111.5<br>(10.8) | 110.1<br>(11)   | -1.4           |               |               | 3.3<br>(0.45)  | 3.5<br>(0.5)  | 6.06  |
| Tjonne 2008                    | CON    | 96.4<br>(12.1)  | 96.2<br>(4.9)   | -0.2<br>(1.2) | 32.1<br>(1.1) | 32.1<br>(1.3) | 0<br>(0.6)     | 114.3<br>(2.7)  | 112<br>(3.4)    | -2.3<br>(1.44) |               |               | 3.1<br>(0.33)  | 3.2<br>(0.33) | 3.22  |
|                                | AE-M   | 91.2<br>(19.5)  | 87.6<br>(6.5)   | -3.6<br>(1.2) | 29.4<br>(1.7) | 28.2<br>(1.5) | -1.2<br>(0.88) | 105.1<br>(5.3)  | 99.1<br>(5)     | -6.0<br>(2.57) |               |               | 3.3<br>(0.32)  | 3.7<br>(0.33) | 12.12 |

|                            |        |                 |                 |                |               |               |                 |                 |                 |                |               |               |                |                |                |       |
|----------------------------|--------|-----------------|-----------------|----------------|---------------|---------------|-----------------|-----------------|-----------------|----------------|---------------|---------------|----------------|----------------|----------------|-------|
|                            | AE-V   | 91.8<br>(17.5)  | 89.5<br>(4.9)   | -2.3<br>(1.2)  | 29.8<br>(1.7) | 29.1<br>(1.5) | -0.7<br>(0.72)  | 105.5<br>(4.1)  | 100.5<br>(3.6)  | -5.0<br>(1.64) |               |               | 3.1<br>(0.23)  | 4.1<br>(0.32)  | 32.26          |       |
| Tong 2018                  | CON    | 68.2<br>(9.9)   | 67.8<br>(10.4)  | -0.4<br>(1.2)  |               |               |                 |                 |                 |                | 40.5<br>(2.6) | 40.5<br>(3.7) | 0.01<br>(0.84) | 1.95<br>(0.19) | 1.91<br>(0.21) | -2.05 |
|                            | AE-V   | 67.7<br>(6.4)   | 64.9<br>(6.2)   | -1.8<br>(1.2)  |               |               |                 |                 |                 |                | 38.4<br>(2.3) | 38.2<br>(2.4) | -0.2<br>(0.83) | 2.08<br>(0.28) | 2.23<br>(0.23) | 7.22  |
|                            | AE-V   | 68.9<br>(12.1)  | 64.9<br>(10.2)  | -4.0<br>(1.2)  |               |               |                 |                 |                 |                | 38.2<br>(2.4) | 38.2<br>(2.4) | 0.01<br>(0.84) | 2.05<br>(0.25) | 2.50<br>(0.22) | 21.95 |
| Tseng 2013 (1)             | CON    | 95.4<br>(3.3)   | 96.2<br>(3.4)   | 0.8<br>(1.5)   | 31.1<br>(1.1) | 31.3<br>(1.1) | 0.2<br>(0.43)   | 99.0<br>(2.6)   | 99.6<br>(2.6)   | 0.6<br>(1.16)  |               |               |                |                |                |       |
|                            | AE-M   | 94.3<br>(4.2)   | 85.8<br>(3.7)   | -8.5<br>(1.2)  | 31.1<br>(1.1) | 28.2<br>(0.9) | -2.9<br>(0.43)  | 101.9<br>(1.6)  | 92.6<br>(1.6)   | -9.3<br>(0.71) |               |               |                |                |                |       |
|                            | R-ML   | 90.2<br>(4.2)   | 84.6<br>(3.8)   | -5.6<br>(1.2)  | 30.4<br>(1.1) | 28.5<br>(1.1) | -1.9<br>(0.47)  | 100.8<br>(2.2)  | 94.4<br>(2.0)   | -6.4<br>(0.94) |               |               |                |                |                |       |
|                            | COM-ML | 95.7<br>(4.4)   | 86.6<br>(3.8)   | -9.1<br>(1.2)  | 31.2<br>(1.2) | 28.2<br>(1.1) | -3<br>(0.5)     | 102.6<br>(2.9)  | 92.9<br>(2.6)   | -9.7<br>(1.23) |               |               |                |                |                |       |
| Tumiati 2008               | CON    | 102.0<br>(28)   | 97.0<br>(22)    | -5.0<br>(1.5)  | 39.0<br>(9.0) | 39.0<br>(8)   | 0.01<br>(4.36)  | 107.0<br>(14.0) | 103.0<br>(17.0) |                |               |               | 3.5<br>(1.1)   | 3.3<br>(1.3)   |                | -5.72 |
|                            | COM-LM | 107.0<br>(2.07) | 96.0<br>(19.0)  | -11.0<br>(1.5) | 38.0<br>(7.0) | 34.0<br>(9.4) | -4.0<br>(1.9)   | 111.0<br>(16.0) | 100.0<br>(11.0) |                |               |               | 3.8<br>(1.2)   | 4.6<br>(1.3)   |                | 21.05 |
| Van-Aggel<br>Leijssen 2001 | CON    | 94.7<br>(14)    | 94.5<br>(14.5)  | -0.2<br>(1.2)  | 32.1<br>(2.9) | 32.4<br>(3.1) | 0.3<br>(2.47)   |                 |                 |                | 44.4<br>(3.1) | 44.8<br>(3.2) | 0.4<br>(1.81)  | 2.6<br>(0.25)  | 2.5<br>(0.17)  | -3.84 |
|                            | AE-M   | 86.5<br>(10.2)  | 87.1<br>(10.1)  | 0.6<br>(1.2)   | 32.8<br>(3.9) | 32.9<br>(3.6) | 0.1<br>(2.99)   |                 |                 |                | 45.0<br>(4.4) | 45.9<br>(4.3) | 0.9<br>(2.2)   | 1.9<br>(0.46)  | 2.1<br>(0.41)  | 10.52 |
|                            | AE-M   | 91.2<br>(9.7)   | 91.2<br>(9.3)   | 0.01<br>(1.2)  | 33.3<br>(3.8) | 33.1<br>(3.9) | -0.22<br>(4.08) |                 |                 |                | 42.6<br>(3.1) | 42.8<br>(2.4) | 0.2<br>(0.9)   | 2.2<br>(0.19)  | 2.3<br>(0.3)   | 4.53  |
| Van-Aggel<br>Leijssen 2002 | CON    | 96.5<br>(10.3)  | 95.9<br>(9.6)   | 0.6<br>(1.2)   | 31.5<br>(2.4) | 31.4<br>(2.5) | -0.1<br>(1.63)  |                 |                 |                | 31.3<br>(4.3) | 31.8<br>(9.4) | 0.5<br>(2.5)   | 2.9<br>(0.4)   | 3.03<br>(0.6)  | 3.48  |
|                            | AE-M   | 102.7<br>(10.8) | 103.1<br>(11.4) | 0.4<br>(1.2)   | 31.6<br>(3.1) | 31.7<br>(3.1) | 0.1<br>(2.3)    |                 |                 |                | 31.9<br>(2.4) | 31.5<br>(2.2) | -0.4<br>(1.15) | 3.2<br>(0.5)   | 3.5<br>(0.5)   | 9.38  |
|                            | AE-V   | 105.5<br>(6.6)  | 105.1<br>(6.2)  | -0.4<br>(1.2)  | 32.2<br>(1.6) | 32.1<br>(1.3) | -0.1<br>(1.6)   |                 |                 |                | 31.6<br>(5.1) | 31.7<br>(5.0) | 0.1<br>(2.52)  | 3.3<br>(0.4)   | 3.8<br>(0.5)   | 15.15 |

---

**Supporting file S5:** Individual study data (pre-post intervention) for all outcome measures not included in NMA

**Pre-Post Outcomes Measures: mean (SD)**

| Authors       | Exercise category | High-density lipoprotein (HDL) mmol/L |                |                      | Triglycerides (TG) mmol/L |                |                      | Fasting blood glucose (FBG) mmol/L |              |                      | Systolic Blood Pressure (SBP) mmHg |         |                      | Diastolic Blood Pressure (DBP) mmHg |        |                      |
|---------------|-------------------|---------------------------------------|----------------|----------------------|---------------------------|----------------|----------------------|------------------------------------|--------------|----------------------|------------------------------------|---------|----------------------|-------------------------------------|--------|----------------------|
|               |                   | pre                                   | post           | Mean difference (SD) | pre                       | post           | Mean difference (SD) | pre                                | post         | Mean difference (SD) | pre                                | post    | Mean difference (SD) | pre                                 | post   | Mean difference (SD) |
| Bonfante 2017 | CON               | 1.12<br>(0.29)                        | 1.16<br>(0.19) |                      | 2.51<br>(1.51)            | 2.49<br>(1.82) |                      | 5.3<br>(0.5)                       | 5.3<br>(0.6) |                      |                                    |         |                      |                                     |        |                      |
|               | COM-LM            | 1.08<br>(0.14)                        | 1.06<br>(0.23) |                      | 2.72<br>(2.19)            | 2.72<br>(2.21) |                      | 5.2<br>(0.6)                       | 4.8<br>(0.6) |                      |                                    |         |                      |                                     |        |                      |
| Church 2007   | CON               | 1.50<br>(0.40)                        | 1.50<br>(0.30) |                      | 1.53<br>(0.75)            | 1.52<br>(0.71) |                      | 5.3<br>(0.6)                       | 5.3<br>(0.4) |                      |                                    |         |                      |                                     |        |                      |
|               | AE-M              | 1.48<br>(0.31)                        | 1.45<br>(0.33) |                      | 1.51<br>(0.81)            | 1.49<br>(0.68) |                      | 5.3<br>(0.4)                       | 5.2<br>(0.3) |                      |                                    |         |                      |                                     |        |                      |
|               | AE-M              | 1.52<br>(0.38)                        | 1.45<br>(0.36) |                      | 1.43<br>(0.65)            | 1.42<br>(0.68) |                      | 5.2<br>(0.5)                       | 5.2<br>(0.6) |                      |                                    |         |                      |                                     |        |                      |
|               | AE-M              | 1.41<br>(0.37)                        | 1.48<br>(0.31) |                      | 1.38<br>(0.66)            | 1.38<br>(0.55) |                      | 5.2<br>(0.5)                       | 5.1<br>(0.4) |                      |                                    |         |                      |                                     |        |                      |
| Croymans 2014 | CON               |                                       |                |                      |                           |                |                      |                                    |              |                      | 128 (7)                            | 128 (6) |                      | 88 (8)                              | 75 (4) |                      |
|               | R-HI              |                                       |                |                      |                           |                |                      |                                    |              |                      | 127 (7)                            | 124 (5) |                      | 81 (5)                              | 76 (6) |                      |
| Dengel 1996   | CON               |                                       |                |                      |                           |                |                      | 5.6<br>(0.2)                       | 5.7<br>(0.2) |                      |                                    |         |                      |                                     |        |                      |
|               | AE-V              |                                       |                |                      |                           |                |                      | 5.6<br>(0.2)                       | 5.7<br>(0.1) |                      |                                    |         |                      |                                     |        |                      |
| Frank 2005    | CON               |                                       |                |                      | 1.33<br>(0.29)            | 1.34<br>(0.36) |                      | 5.4<br>(0.5)                       | 5.5<br>(0.4) |                      |                                    |         |                      |                                     |        |                      |
|               | AE-M              |                                       |                |                      | 1.36<br>(0.22)            | 1.32<br>(0.28) |                      | 5.6<br>(0.4)                       | 5.5<br>(0.4) |                      |                                    |         |                      |                                     |        |                      |

|              |        |                |                |                |                |              |               |             |             |         |         |  |
|--------------|--------|----------------|----------------|----------------|----------------|--------------|---------------|-------------|-------------|---------|---------|--|
| Gram 2018    | CON    | 1.18<br>(0.30) | 1.12<br>(0.23) | 1.10<br>(0.80) | 1.10<br>(0.60) |              |               |             |             |         |         |  |
|              | AE-M   | 1.31<br>(0.37) | 1.32<br>(0.36) | 1.10<br>(0.70) | 1.20<br>(0.80) |              |               |             |             |         |         |  |
|              | AE-M   | 1.23<br>(0.23) | 1.30<br>(0.31) | 1.20<br>(0.70) | 1.10<br>(0.60) |              |               |             |             |         |         |  |
|              | AE-V   | 1.23<br>(0.29) | 1.28<br>(0.31) | 1.30<br>(0.40) | 1.00<br>(0.50) |              |               |             |             |         |         |  |
| Ho 2012      | CON    | 1.42<br>(0.11) | 1.35<br>(0.10) | 1.25<br>(0.17) | 1.48<br>(0.23) | 5.4<br>(0.1) | 5.36<br>(0.2) | 117<br>(12) | 116<br>(13) | 66 (2)  | 63 (2)  |  |
|              | AE-M   | 1.38<br>(0.09) | 1.28<br>(0.07) | 1.36<br>(0.19) | 1.40<br>(0.16) | 5.8<br>(0.2) | 5.7<br>(0.1)  | 122<br>(14) | 120<br>(14) | 67 (2)  | 68 (2)  |  |
|              | R-ML   | 1.34<br>(0.08) | 1.44<br>(0.08) | 1.27<br>(0.12) | 1.38<br>(0.18) | 5.7<br>(0.5) | 5.8<br>(0.2)  | 124<br>(15) | 124<br>(15) | 71 (2)  | 70 (3)  |  |
|              | COM-ML | 1.42<br>(0.11) | 1.41<br>(0.11) | 1.10<br>(0.10) | 1.36<br>(0.17) | 5.7<br>(0.1) | 5.6<br>(0.1)  | 115<br>(13) | 113<br>(14) | 66 (2)  | 64 (2)  |  |
| Irving 2008  | CON    | 1.18<br>(0.11) | 1.32<br>(0.23) | 2.43<br>(1.31) | 2.71<br>(1.53) | 5.9<br>(0.8) | 6.1<br>(0.9)  | 126<br>(17) | 124<br>(10) | 82 (12) | 78 (10) |  |
|              | AE-V   | 1.14<br>(0.21) | 1.82<br>(0.11) | 2.13<br>(0.86) | 2.21<br>(1.11) | 5.9<br>(0.8) | 5.7<br>(0.7)  | 131<br>(12) | 127<br>(11) | 75 (7)  | 76 (7)  |  |
|              | AE-M   | 1.21<br>(0.22) | 1.34<br>(0.20) | 1.41<br>(0.55) | 1.43<br>(0.45) | 6<br>(1.4)   | 6.3<br>(1.4)  | 126<br>(16) | 123<br>(15) | 76 (8)  | 74 (8)  |  |
| Keating 2015 | CON    | 1.40<br>(0.13) | 1.40<br>(0.12) | 1.61<br>(0.32) | 1.51<br>(0.31) | 4.0<br>(0.2) | 4.0<br>(0.2)  | 119 (4)     | 119<br>(13) | 78 (2)  | 76 (8)  |  |
|              | AE-V   | 1.20<br>(0.11) | 1.30<br>(0.12) | 1.53<br>(0.21) | 1.52<br>(0.22) | 4.5<br>(0.3) | 4.3<br>(0.3)  | 123 (5)     | 123<br>(4)  | 83 (2)  | 80 (2)  |  |
|              | AE-M   | 1.40<br>(0.14) | 1.30<br>(0.12) | 1.80<br>(0.31) | 1.80<br>(0.30) | 4.3<br>(0.2) | 4.4<br>(0.2)  | 125 (5)     | 123<br>(4)  | 77 (3)  | 76 (3)  |  |
|              | AE-M   | 1.50<br>(0.12) | 1.40<br>(0.11) | 1.40<br>(0.20) | 1.41<br>(0.21) | 4.4<br>(0.2) | 4.3<br>(0.1)  | 116 (4)     | 116<br>(2)  | 79 (2)  | 73 (3)  |  |
| Keating 2017 | CON    | 1.80<br>(0.30) | 1.50<br>(0.20) | 1.40<br>(0.20) | 1.40<br>(0.20) | 4<br>(0.1)   | 4<br>(1.2)    | 118 (4)     | 117 (2)     | 78 (2)  | 76 (2)  |  |
|              | R-HI   | 1.50<br>(0.10) | 1.70<br>(0.20) | 1.24<br>(0.10) | 1.20<br>(0.20) | 4.1<br>(0.2) | 4.2<br>(0.2)  | 117 (3)     | 117 (2)     | 77 (2)  | 76 (2)  |  |

|                     |        |                |                |                |                |               |               |             |             |         |        |
|---------------------|--------|----------------|----------------|----------------|----------------|---------------|---------------|-------------|-------------|---------|--------|
| Mengistie 2013      | CON    |                |                |                |                | 5.9<br>(0.36) | 0.2<br>(0.1)  | 112 (5)     | -3 (2)      | 81 (4)  | 2 (1)  |
|                     | COM-LM |                |                |                |                | 5.7<br>(0.36) | -0.3<br>(0.2) | 112 (5)     | -3 (2)      | 0 (3)   | -2 (1) |
| Moghasdasi 2012     | CON    |                |                |                |                | 5.7<br>(0.47) | 5.6<br>(0.4)  |             |             |         |        |
|                     | AE-V   |                |                |                |                | 5.3<br>(0.4)  | 4.7<br>(0.3)  |             |             |         |        |
| Mohanka 2006        | CON    | 1.36<br>(0.40) | 1.33<br>(0.34) | 1.51<br>(0.80) | 1.50<br>(0.90) |               |               |             |             |         |        |
|                     | AE-M   | 1.34<br>(0.29) | 1.34<br>(0.31) | 1.57<br>(0.66) | 1.46<br>(0.92) |               |               |             |             |         |        |
| Mora-Rodriguez 2017 | CON    | 0.83<br>(0.14) | 0.86<br>(0.18) | 1.65<br>(1.20) | 1.50<br>(0.73) |               |               |             |             |         |        |
|                     | AE-V   | 0.91<br>(0.18) | 0.94<br>(0.24) | 1.54<br>(0.81) | 1.51<br>(0.92) |               |               |             |             |         |        |
| Nunes 2016          | CON    | 1.61<br>(0.29) | 1.57<br>(0.22) | 2.77<br>(1.10) | 2.71<br>(0.91) |               |               |             |             |         |        |
|                     | R-ML   | 1.55<br>(0.20) | 1.49<br>(0.31) | 2.98<br>(1.17) | 2.99<br>(0.91) |               |               |             |             |         |        |
|                     | R-ML   | 1.72<br>(0.22) | 1.69<br>(0.30) | 2.57<br>(0.98) | 2.54<br>(0.72) |               |               |             |             |         |        |
| Ross 2015           | CON    | 1.21<br>(0.30) |                | 1.80<br>(1.0)  |                | 5.4<br>(0.7)  |               | 114<br>(13) | -1 (5)      | 79 (8)  | 1 (3)  |
|                     | AE-M   | 1.22<br>(0.30) |                | 1.90<br>(1.10) |                | 5.4<br>(0.6)  |               | 112<br>(11) | -5 (8)      | 80 (8)  | -4 (5) |
|                     | AE-M   | 1.20<br>(0.40) |                | 1.50<br>(0.81) |                | 5.5<br>(0.6)  |               | 114<br>(13) | -3 (7)      | 80 (8)  | -2 (4) |
|                     | AE-V   | 1.23<br>(0.40) |                | 1.60<br>(0.73) |                | 5.5<br>(0.5)  |               | 114<br>(16) | -2 (6)      | 80 (9)  | -2 (2) |
| Sarsan 2006         | CON    |                |                |                |                |               |               | 127<br>(17) | 127<br>(15) | 78 (9)  | 77 (8) |
|                     | AE-M   |                |                |                |                |               |               | 121<br>(20) | 120<br>(20) | 80 (10) | 73 (9) |
|                     | R-ML   |                |                |                |                |               |               |             |             | 80 (5)  | 73 (9) |





|            |        |                |                |              |              |             |             |         |         |
|------------|--------|----------------|----------------|--------------|--------------|-------------|-------------|---------|---------|
| Tseng 2013 | CON    | 1.21<br>(0.44) | 1.13<br>(0.40) | 4.9<br>(0.2) | 4.8<br>(0.2) | 127 (8)     | 126 (8)     | 82 (8)  | 82 (9)  |
|            | AE-M   | 1.01<br>(0.21) | 0.95<br>(0.24) | 5.0<br>(0.6) | 4.5<br>(0.4) | 120<br>(10) | 120<br>(10) | 76 (10) | 76 (10) |
|            | R-ML   | 1.10<br>(0.31) | 1.05<br>(0.32) | 4.9<br>(0.9) | 4.5<br>(0.9) | 118 (9)     | 119 (9)     | 73 (8)  | 73 (8)  |
|            | COM-ML | 1.10           | 1.03           | 4.8          | 4.7          | 123 (9)     | 123 (9)     | 78 (10) | 78 (10) |

---

**Supporting file S6:** Additional information relating to exercise intervention type contributing to each network meta-analysis

**Weight Loss**

| Exercise Type              | Freq.     | Percent       | Cum.   |
|----------------------------|-----------|---------------|--------|
| control                    | 30        | 38.46         | 38.46  |
| vigorous aerobic           | 16        | 20.51         | 58.97  |
| moderate aerobic           | 13        | 16.67         | 75.64  |
| high resistance            | 3         | 3.85          | 79.49  |
| low-to-moderate resistance | 7         | 8.97          | 88.46  |
| high combined              | 2         | 2.56          | 91.03  |
| low combined               | 7         | 8.97          | 100.00 |
| <b>Total</b>               | <b>78</b> | <b>100.00</b> |        |

**Body Mass Index**

| Exercise Type              | Freq.     | Percent       | Cum.   |
|----------------------------|-----------|---------------|--------|
| control                    | 27        | 38.03         | 38.03  |
| vigorous aerobic           | 15        | 21.13         | 59.15  |
| moderate aerobic           | 13        | 18.31         | 77.46  |
| high resistance            | 3         | 4.23          | 81.69  |
| low-to-moderate resistance | 6         | 8.45          | 90.14  |
| high combined              | 1         | 1.41          | 91.55  |
| low combined               | 6         | 8.45          | 100.00 |
| <b>Total</b>               | <b>71</b> | <b>100.00</b> |        |

**Waist Circumference**

| Exercise Type    | Freq. | Percent | Cum.  |
|------------------|-------|---------|-------|
| control          | 18    | 37.50   | 37.50 |
| vigorous aerobic | 7     | 14.58   | 52.08 |
| moderate aerobic | 10    | 20.83   | 72.92 |

|                            |  |    |        |        |
|----------------------------|--|----|--------|--------|
| high resistance            |  | 5  | 10.42  | 83.33  |
| low to moderate resistance |  | 3  | 6.25   | 89.58  |
| low combined               |  | 5  | 10.42  | 100.00 |
| -----+                     |  |    |        |        |
| Total                      |  | 48 | 100.00 |        |

### Percentage Body Fat

| Exercise Type              |  | Freq. | Percent | Cum.   |
|----------------------------|--|-------|---------|--------|
| -----+                     |  |       |         |        |
| control                    |  | 20    | 40.82   | 40.82  |
| vigorous aerobic           |  | 10    | 20.41   | 61.22  |
| moderate aerobic           |  | 7     | 14.29   | 75.51  |
| high resistance            |  | 3     | 6.12    | 81.63  |
| low to moderate resistance |  | 3     | 6.12    | 87.76  |
| high combined              |  | 2     | 4.08    | 91.84  |
| low combined               |  | 4     | 8.16    | 100.00 |
| -----+                     |  |       |         |        |
| Total                      |  | 49    | 100.00  |        |

### Fitness

| Exercise Type              |  | Freq. | Percent | Cum.   |
|----------------------------|--|-------|---------|--------|
| -----+                     |  |       |         |        |
| control                    |  | 21    | 37.50   | 37.50  |
| vigorous aerobic           |  | 12    | 21.43   | 58.93  |
| moderate aerobic           |  | 13    | 23.21   | 82.14  |
| high resistance            |  | 3     | 5.36    | 87.50  |
| low-to-moderate resistance |  | 2     | 3.57    | 91.07  |
| high combined              |  | 3     | 5.36    | 96.43  |
| low combined               |  | 2     | 3.57    | 100.00 |
| -----+                     |  |       |         |        |
| Total                      |  | 56    | 100.00  |        |

**Supporting file S7:** Additional information pertaining to number of intervention arms contributing to direct/indirect analysis for each MNA

**Weight Loss**

| <b>Interventions</b> | <b>n=</b> | <b>Percent</b> | <b>Cumulative Percent</b> |
|----------------------|-----------|----------------|---------------------------|
| AE-V: CON            | 15        | 21.74          | 21.74                     |
| AE-M: CON            | 13        | 18.84          | 40.58                     |
| AE-V: AE-M           | 5         | 7.25           | 47.83                     |
| R-HI: CON            | 3         | 4.35           | 52.17                     |
| R-HI: AE-M           | 3         | 4.35           | 56.52                     |
| R-LM: CON            | 7         | 10.14          | 66.67                     |
| R-LM: AE-V           | 2         | 2.90           | 69.57                     |
| R-LM: AE-M           | 2         | 2.90           | 72.46                     |
| COM-LM: CON          | 2         | 2.90           | 75.36                     |
| COM-LM: AE-V         | 1         | 1.45           | 76.81                     |
| COM-LM: R-LM         | 1         | 1.45           | 78.26                     |
| COM-HI: CON          | 7         | 10.14          | 88.41                     |
| COM-HI: AE-M         | 1         | 1.45           | 89.86                     |
| COM-HI: R-HI         | 3         | 4.35           | 94.20                     |
| COM HI: R-LM         | 1         | 1.45           | 95.65                     |
| COM-HI: COM-LM       | 3         | 4.35           | 100.00                    |

**Body Mass Index**

| <b>Interventions</b> | <b>n=</b> | <b>Percent</b> | <b>Cumulative Percent</b> |
|----------------------|-----------|----------------|---------------------------|
| AE-V: CON            | 14        | 22.22          | 22.22                     |
| AE-M: CON            | 13        | 20.63          | 42.86                     |
| AE-V: AE-M           | 6         | 9.52           | 52.38                     |
| R-HI: CON            | 3         | 4.76           | 57.14                     |
| R-HI: AE-M           | 3         | 4.76           | 61.90                     |
| R-LM: CON            | 6         | 9.52           | 71.43                     |
| R-LM: AE-V           | 1         | 1.59           | 73.02                     |
| COM-HI: CON          | 2         | 3.17           | 76.19                     |
| COM-LM: CON          | 1         | 1.59           | 77.78                     |

|              |   |      |        |
|--------------|---|------|--------|
| COM-LM: AE-V | 6 | 9.52 | 87.30  |
| COM-LM: AE-M | 4 | 6.35 | 93.65  |
| COM-LM: R-HI | 1 | 1.59 | 95.24  |
| COM-LM: R-LM | 3 | 4.76 | 100.00 |

### Waist Circumference

| Interventions | n= | Percent | Cumulative Percent |
|---------------|----|---------|--------------------|
| AE-V: CON     | 7  | 14.89   | 14.89              |
| AE-M: CON     | 10 | 21.28   | 36.17              |
| AE-V: AE-M    | 4  | 8.51    | 44.68              |
| R-HI: CON     | 5  | 10.64   | 55.32              |
| R-HI: AE-M    | 4  | 8.51    | 63.83              |
| R-LM: CON     | 4  | 8.51    | 72.34              |
| R-LM: AE-V    | 1  | 2.13    | 74.47              |
| R-LM: AE-M    | 1  | 2.13    | 76.60              |
| COM-LM: CON   | 5  | 10.64   | 87.23              |
| COM-LM: AE-V  | 1  | 2.13    | 89.36              |
| COM-LM: AE-M  | 2  | 4.26    | 93.62              |
| COM-LM: R-HI  | 1  | 2.13    | 95.74              |
| COM-LM: R-LM  | 2  | 4.26    | 100.00             |

### Percentage Body Fat

| Interventions | n= | Percent | Cumulative Percent |
|---------------|----|---------|--------------------|
| AE-V: CON     | 9  | 21.43   | 26.19              |
| AE-M: CON     | 7  | 16.67   | 42.86              |
| AE-V: AE-M    | 2  | 4.76    | 47.62              |
| R-HI: CON     | 3  | 7.14    | 54.76              |
| R-HI: AE-M    | 2  | 4.76    | 59.52              |
| R-LM: CON     | 3  | 7.14    | 66.67              |
| R-LM: AE-V    | 1  | 2.38    | 69.05              |
| R-LM: AE-M    | 1  | 2.38    | 71.43              |

|              |   |      |        |
|--------------|---|------|--------|
| COM-LM: CON  | 2 | 4.76 | 76.19  |
| COM-LM: AE-V | 1 | 2.38 | 78.57  |
| COM-LM: R-LM | 1 | 2.38 | 80.95  |
| COM-HI: CON  | 4 | 9.52 | 90.48  |
| COM-HI: AE-M | 2 | 4.76 | 95.24  |
| COM-HI: R-HI | 1 | 2.38 | 97.62  |
| COM-HI: R-LM | 1 | 2.38 | 100.00 |

### Fitness

| <b>Interventions</b> | <b>n=</b> | <b>Percent</b> | <b>Cumulative Percent</b> |
|----------------------|-----------|----------------|---------------------------|
| AE-V: CON            | 10        | 21.74          | 21.74                     |
| AE-M: CON            | 12        | 26.09          | 47.83                     |
| AE-V: AE-M           | 5         | 10.89          | 58.70                     |
| R-HI: CON            | 2         | 4.35           | 63.04                     |
| R-HI: AE-V           | 2         | 4.35           | 67.39                     |
| R-HI: AE-M           | 1         | 2.17           | 69.57                     |
| R-LM: AE-V           | 1         | 2.38           | 69.05                     |
| R-LM: CON            | 3         | 6.52           | 82.61                     |
| COM-HI: CON          | 2         | 4.35           | 86.96                     |
| COM-HI: AE-V         | 1         | 2.17           | 89.13                     |
| COM-HI: R-HI         | 1         | 2.17           | 91.30                     |
| COM-LM: CON          | 2         | 4.35           | 95.65                     |
| COM-LM: AE-M         | 1         | 2.17           | 97.82                     |
| COM-LM: R-LM         | 1         | 2.17           | 100.00                    |

## Supporting File S8: Funnel Plots

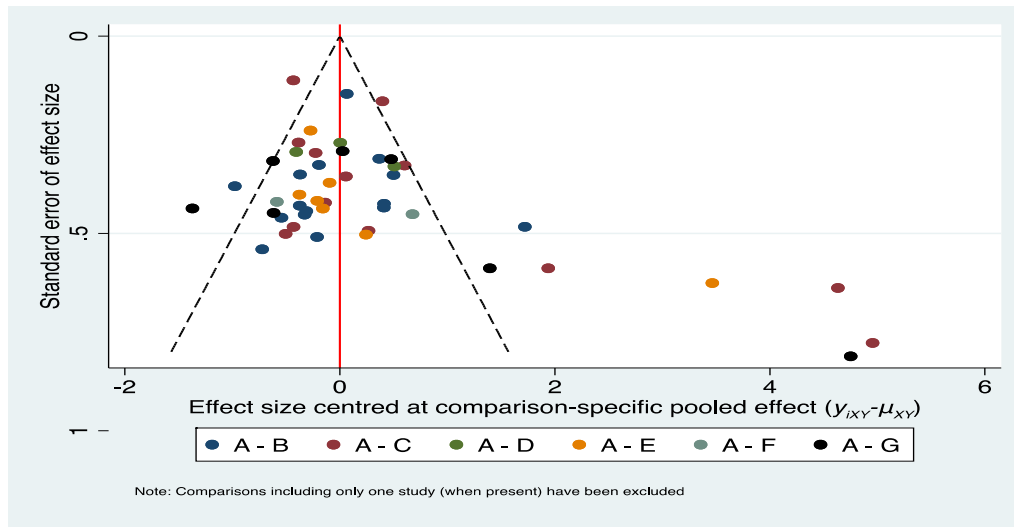

a) Weight loss

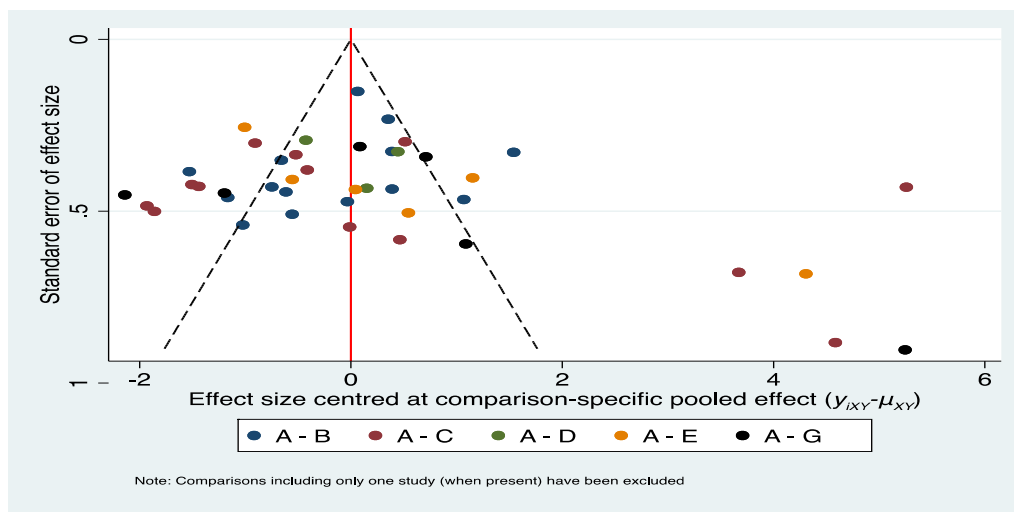

b) Body Mass Index (BMI)

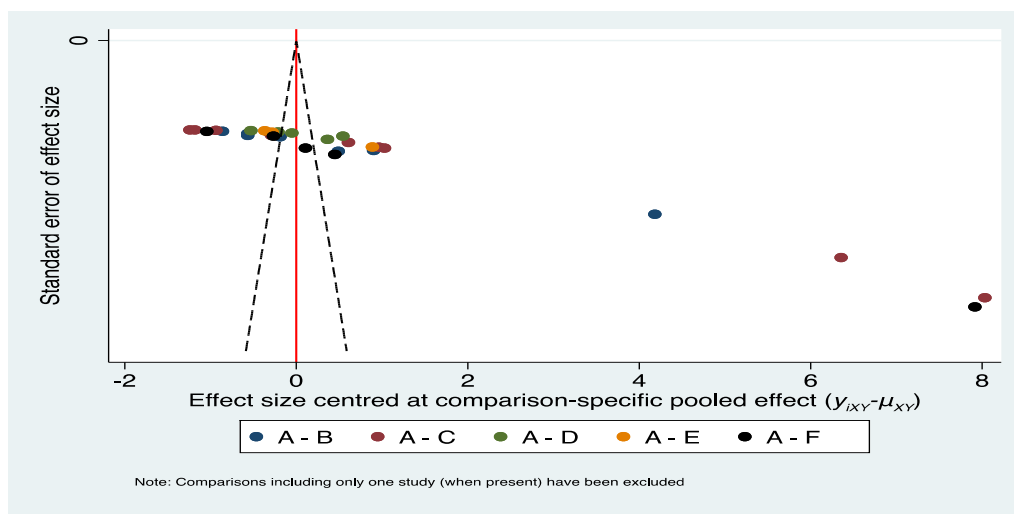

c) Waist circumference (WC)



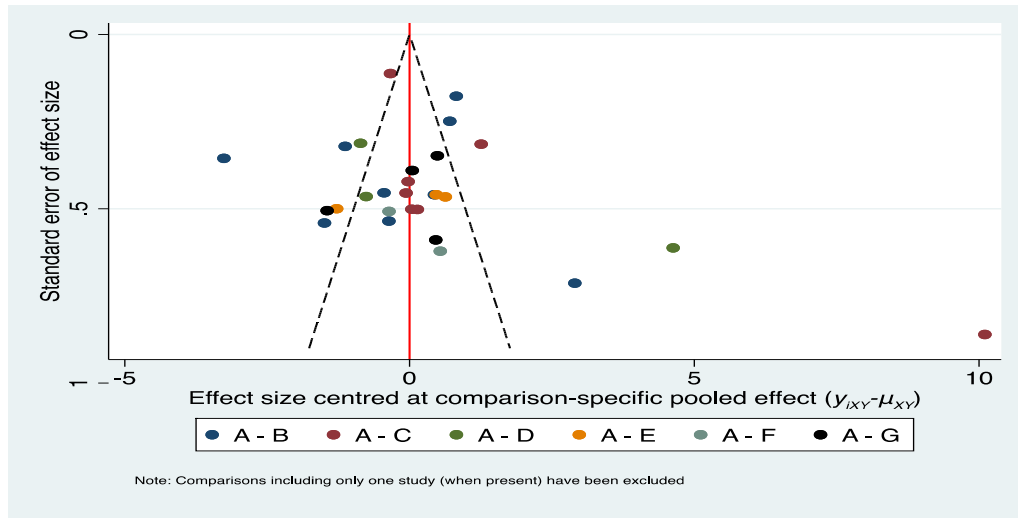

d) Percentage body fat (%)

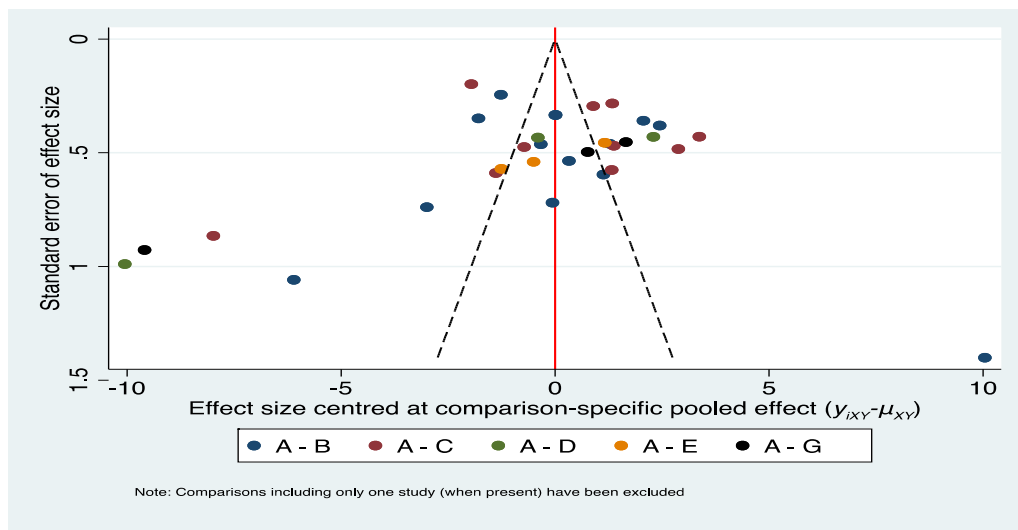

e) Fitness (maximal oxygen uptake)

**Figure S8:** Funnel plots to illustrate the presence or absence of publication bias in the network meta-analyses. The outer dashed lines indicate the triangular region within which 95% of studies are expected to lie in the absence of both biases and heterogeneity.
